# Supplementary material
Source: publisher figshare collection journal article supplement (https://frontiersin.figshare.com/ndownloader/files/22043712)
Supplement: Supplementary file 1 [file 22043712]

Table 1. The sea surface wind speed and direction of Pattani weather observing at station. Data were calculated as the average during 2015 to 2017.


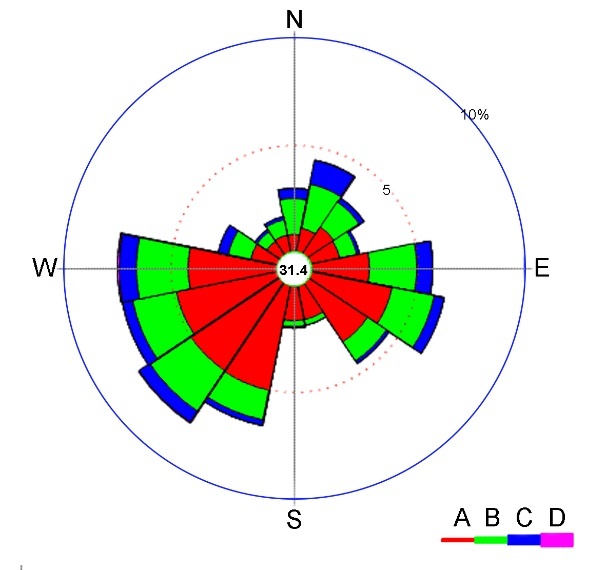


Speed: A 0.00 - <5.40 km/h

B 5.40 - <8.86 km/h

C 8.86 - <16.09 km/h

D 16.09 - <24.95 km/h

| Direction | Percentage | | | |  |
| --- | --- | --- | --- | --- | --- |
| A | B | C | D | Total |
| N | 0.8 | 1.6 | 0.5 | 0.0 | 2.9 |
| NNE | 1.1 | 2.1 | 1.1 | 0.0 | 4.3 |
| NE | 1.5 | 1.4 | 0.2 | 0.0 | 3.1 |
| ENE | 1.4 | 0.8 | 0.1 | 0.0 | 2.3 |
| E | 2.8 | 2.2 | 0.7 | 0.0 | 5.7 |
| ESE | 3.9 | 2.0 | 0.4 | 0.0 | 6.3 |
| SE | 3.4 | 1.1 | 0.1 | 0.0 | 4.6 |
| SSE | 1.7 | 0.3 | 0.0 | 0.0 | 2.0 |
| S | 1.7 | 0.3 | 0.0 | 0.0 | 2.0 |
| SSW | 5.1 | 1.4 | 0.2 | 0.0 | 6.7 |
| SW | 5.0 | 2.3 | 0.6 | 0.0 | 7.9 |
| WSW | 4.8 | 2.1 | 0.5 | 0.0 | 7.4 |
| W | 4.2 | 2.4 | 0.8 | 0.1 | 7.5 |
| WNW | 1.2 | 1.1 | 0.5 | 0.0 | 2.8 |
| NW | 0.7 | 0.5 | 0.2 | 0.0 | 1.4 |
| NNW | 0.8 | 0.8 | 0.1 | 0.0 | 1.7 |
| Calm | 31.4 | | | | |
| Total | 40.1 | 22.4 | 6.0 | 0.1 | 100 |

Data source: The Thai Meteorological Department, Ministry of Digital Economy and Society (http://www.aws-observation.tmd.go.th)
